# Supplementary material for: Chronically Radiation-Exposed Survivor Glioblastoma Cells Display Poor Response to Chk1 Inhibition under Hypoxia
Source: MDPI journal article supplement (doi:10.3390/ijms23137051), 2022-06-24
Supplement: s1 [file s1]

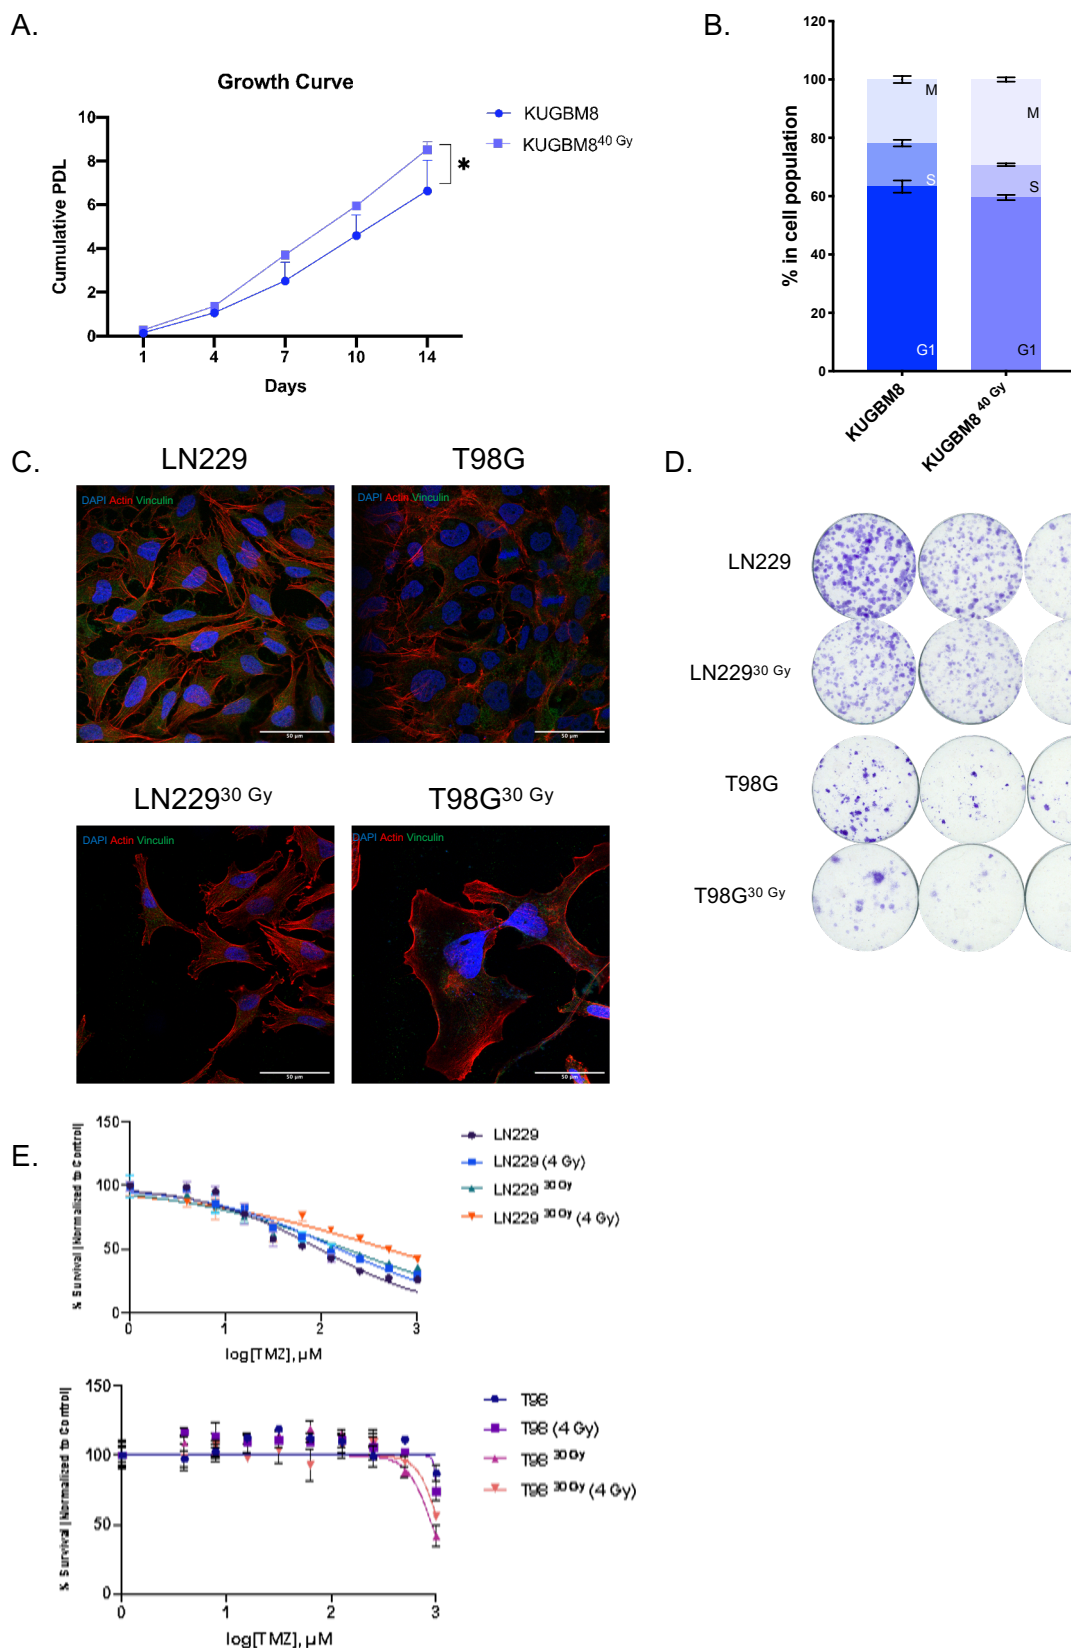

**Supplementary Figure S1. A.** Proliferation rates of KUGBM8 and KUGBM8<sup>40 Gy</sup> cells. **B.** Cell cycle distributions of KUGBM8 and KUGBM8<sup>40 Gy</sup> cells. **C.** Immunofluorescence staining for T98G and LN229 cells and their IR-Surv populations (DAPI: blue, Actin: red, Vinculin: Green). **D.** Representative images of clonogenic assay upon increasing doses of IR of T98G and LN229 cell lines. **E.** Dose-response curves of naïve and IR-Surv T98G and LN229 cells upon TMZ, IR or combination treatment.

A.

U373

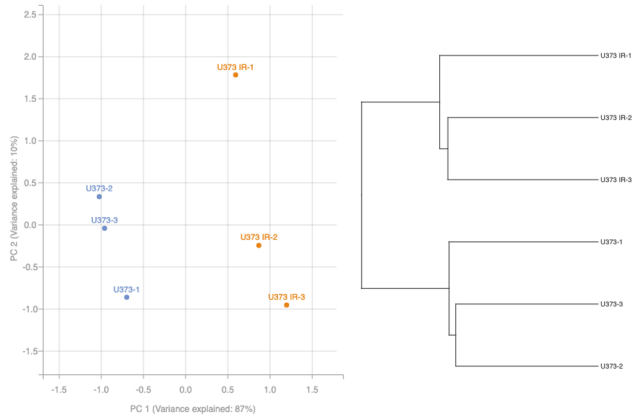

B.

KUGBM8

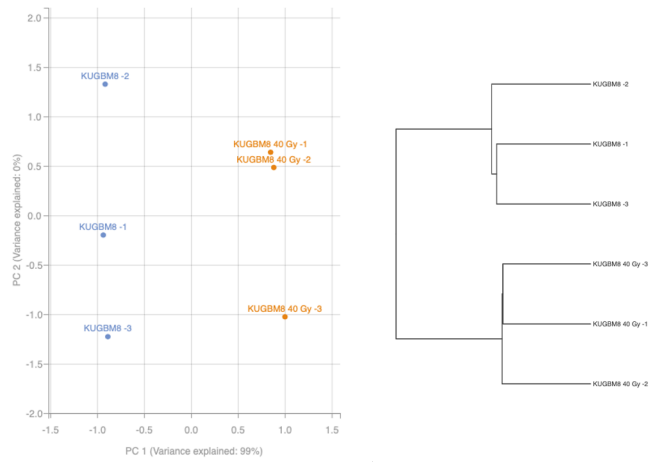

C.

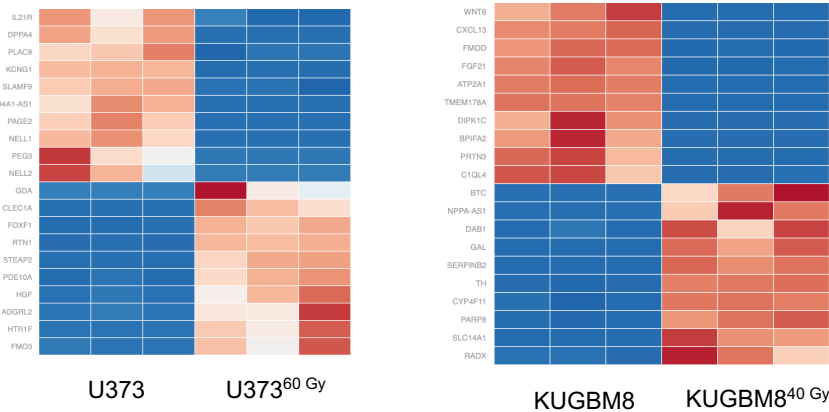

D.

**Hallmark Pathways**  
(U373 vs. U373<sup>60 Gy</sup>)

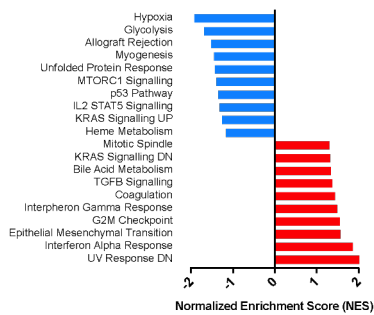

E.

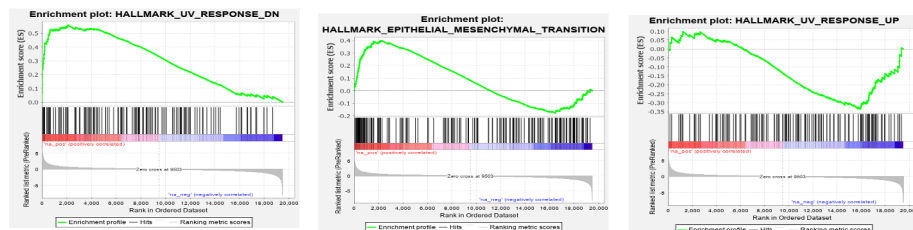

F.

**Hallmark Pathways**  
(KUGBM8 vs. KUGBM8<sup>40 Gy</sup>)

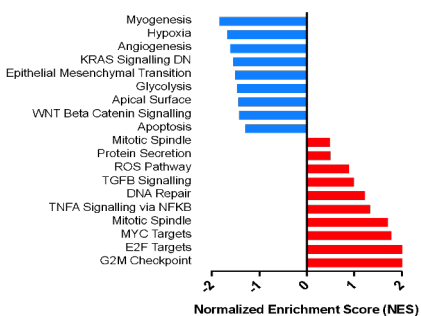

G.

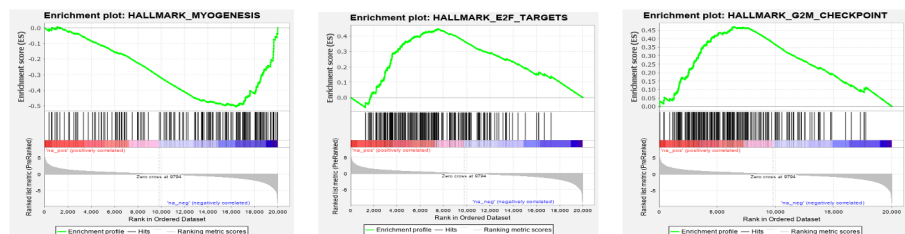

**Supplementary Figure S2. A-B.** Principal component analysis (PCA) plots and representations of hierarchical clustering of U373-U373<sup>60 Gy</sup> and KUGBM8-KUGBM8<sup>40 Gy</sup> samples. **C.** Heatmap of top 10 differentially upregulated and downregulated genes in U373-U373<sup>60 Gy</sup> and KUGBM8-KUGBM8<sup>40 Gy</sup> cells. **D-E.** Hallmark GSEA and representative enrichment plots of U373 cells. **F-G.** Hallmark GSEA and representative enrichment plots of KUGBM8 cells.

A. Hallmark Hypoxia

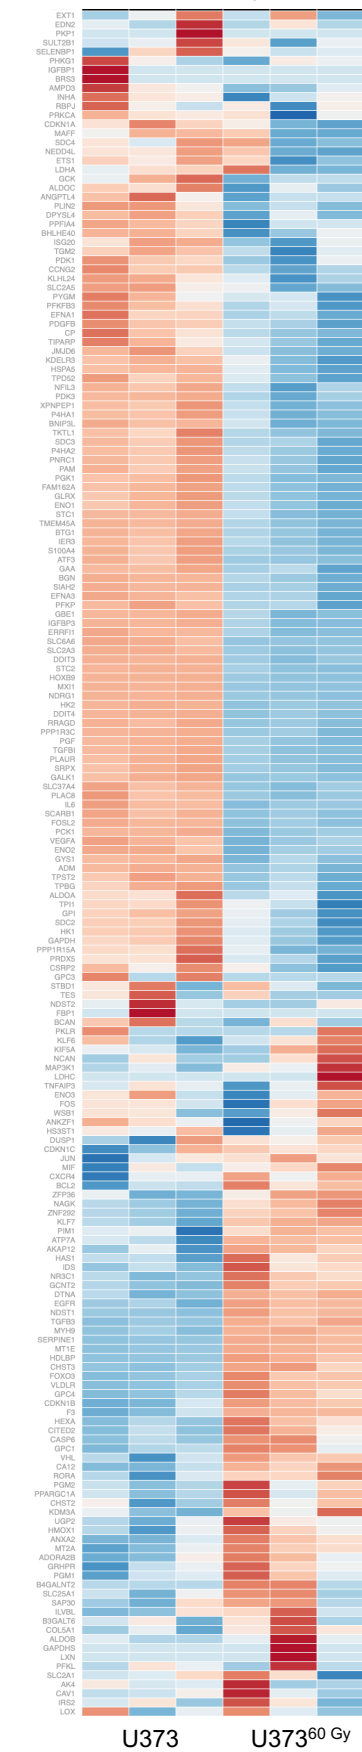

B. Hallmark Hypoxia

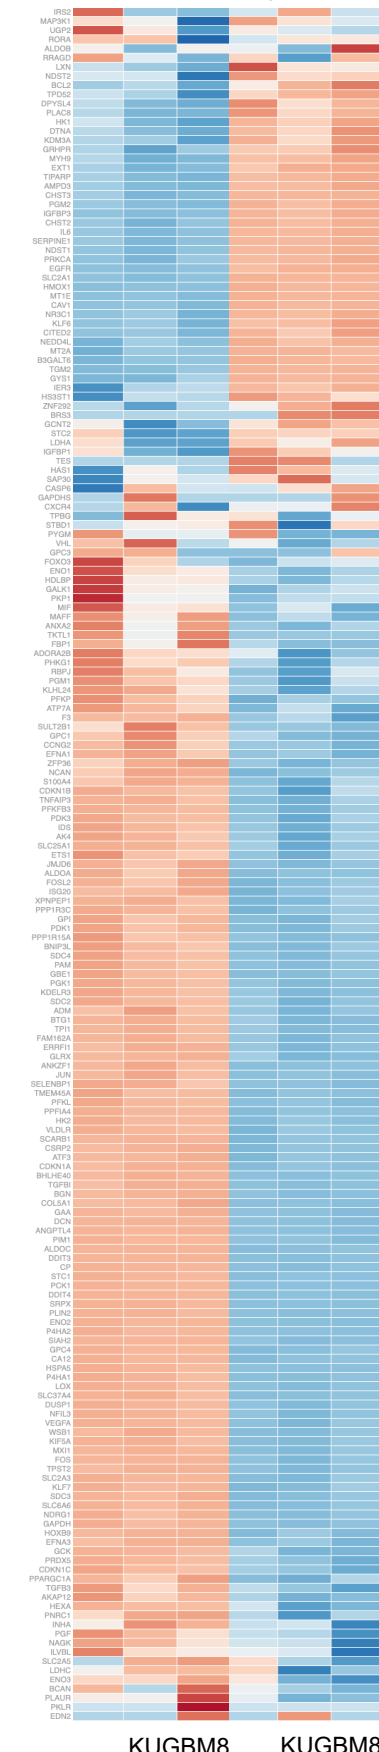

| Gene     | Log2(FCI)      | Gene  | Log2(FCI) |
|----------|----------------|-------|-----------|
| GPC1     | 0.000DLR       | -1.70 |           |
| MDLR     | 0.000CARB1     | -1.84 |           |
| FOXO3    | -0.001HULH48   | -1.88 |           |
| PLAUR    | -0.001CA12     | -1.92 |           |
| ANXA2    | -0.001SLC2A3   | -1.96 |           |
| VHL      | -0.001SRPX     | -1.98 |           |
| SLVB     | -0.001SG2      | -2.00 |           |
| POF      | -0.001FAM162A  | -2.08 |           |
| NAGK     | -0.001SRPRCSC  | -2.08 |           |
| ENO1     | -0.101MT1E     | -2.14 |           |
| PGM1     | -0.101PLN2     | -2.22 |           |
| GPI      | -0.101MXO1     | -2.22 |           |
| HEXA     | -0.101PKP1     | -2.40 |           |
| KLHL24   | -0.101PPF1A4   | -2.42 |           |
| SLC2A5   | -0.201GAA      | -2.48 |           |
| PNRC1    | -0.201P4H1     | -2.50 |           |
| ADORA2B  | -0.201CDKN1C   | -2.54 |           |
| GALK1    | -0.201HSP45    | -2.58 |           |
| ATP7A    | -0.201RFA      | -2.68 |           |
| BBP1     | -0.201CAN      | -2.68 |           |
| TGFB3    | -0.201CTE2     | -2.74 |           |
| PFKP     | -0.301FNA3     | -2.90 |           |
| ENO3     | -0.301CK       | -2.98 |           |
| ADM      | -0.301ENO2     | -3.18 |           |
| F3       | -0.301SRP2     | -3.28 |           |
| XPPEP1   | -0.301PC4      | -3.42 |           |
| PPH1R15A | -0.301SGN      | -3.48 |           |
| TNFAIP3  | -0.301DOT3     | -3.62 |           |
| CDKN2    | -0.401BP1      | -3.68 |           |
| TFEB     | -0.401DOT4     | -4.08 |           |
| MAFF     | -0.401ALDO     | -4.18 |           |
| JUN      | -0.401TCT1     | -4.20 |           |
| CDKN1B   | -0.401DCN      | -4.42 |           |
| SLC25A1  | -0.401SUL2B1   | -4.62 |           |
| PFKFB3   | -0.401HXB      | -5.24 |           |
| SDC1     | -0.401SELENBP1 | -5.68 |           |
| PPGM     | -0.501ANGPTL4  | -5.78 |           |
| ET1      | -0.501SGP2     | 0.08  |           |
| AKAP12   | -0.501PBG      | 0.08  |           |
| CDKN2    | -0.501PDA      | 0.10  |           |
| TRIL     | -0.501BAGD     | 0.14  |           |
| PRDX5    | -0.501RS2      | 0.14  |           |
| GAPDH    | -0.501STB01    | 0.18  |           |
| BNIP3L   | -0.501STC2     | 0.18  |           |
| IDS      | -0.501CASP6    | 0.18  |           |
| TPST2    | -0.501DHA      | 0.20  |           |
| NDRG1    | -0.701MAPK1    | 0.24  |           |
| HMJ06    | -0.701AP28     | 0.30  |           |
| SLC6A6   | -0.701SPYSL4   | 0.30  |           |
| COL5A1   | -0.701K1       | 0.34  |           |
| PKD1     | -0.701K1       | 0.34  |           |
| S100A4   | -0.801SRPR     | 0.38  |           |
| DUSP1    | -0.801TNA      | 0.40  |           |
| AK4      | -0.901CTE2     | 0.40  |           |
| PKD1     | -0.901EXT1     | 0.40  |           |
| PPARGC1A | -0.901KDMA     | 0.40  |           |
| PHKG1    | -0.901MYH9     | 0.44  |           |
| PAM      | -0.901KLF6     | 0.50  |           |
| PFKL     | -0.901CNT2     | 0.52  |           |
| VEGFA    | -1.001HAS1     | 0.60  |           |
| GBE1     | -1.001P51      | 0.60  |           |
| ANKZF1   | -1.001NEODL    | 0.68  |           |
| ZFP36    | -1.001HS3T1    | 0.70  |           |
| LHC      | -1.001SGM2     | 0.74  |           |
| HK2      | -1.101SGALT6   | 0.78  |           |
| ERRF1    | -1.101SLC2     | 0.80  |           |
| INHA     | -1.101CXCR4    | 0.92  |           |
| GLRX     | -1.101NDST2    | 1.02  |           |
| SLC37A4  | -1.101NDST2    | 1.10  |           |
| KLF7     | -1.101SLC1     | 1.10  |           |
| ALDOA    | -1.201PRKCA    | 1.10  |           |
| ROSLB3   | -1.201K4       | 1.18  |           |
| SDC4     | -1.201TPARP    | 1.18  |           |
| EFNA1    | -1.201CHT3     | 1.18  |           |
| CDKN1A   | -1.201PD52     | 1.20  |           |
| TMEM45A  | -1.201SLC2A1   | 1.30  |           |
| BCAN     | -1.201AMP03    | 1.30  |           |
| FOS      | -1.301ER3      | 1.32  |           |
| SIAR2    | -1.301XN       | 1.58  |           |
| SDC2     | -1.401HMOX1    | 1.68  |           |
| NFIL3    | -1.401GFBP1    | 1.68  |           |
| ATF3     | -1.401NDST1    | 1.68  |           |
| STC1     | -1.501NDST2    | 1.78  |           |
| MT1E     | -1.501EGFR     | 1.88  |           |
| LOX      | -1.501CAV1     | 2.00  |           |
| PKG1.00  | -1.501T2A      | 2.82  |           |
| P4H2     | -1.601SERPINE1 | 2.98  |           |
| STC1     | -1.601TGM2     | 3.28  |           |
| WSB1     | -1.701PLA2     | 3.98  |           |
|          | MT1E           | 4.32  |           |

Supplementary Figure S3. A-B. Differential expression heat map of Hallmark Hypoxia gene set for U373 (A) and KUGBM8 (B) cells and DEG scores for each gene.

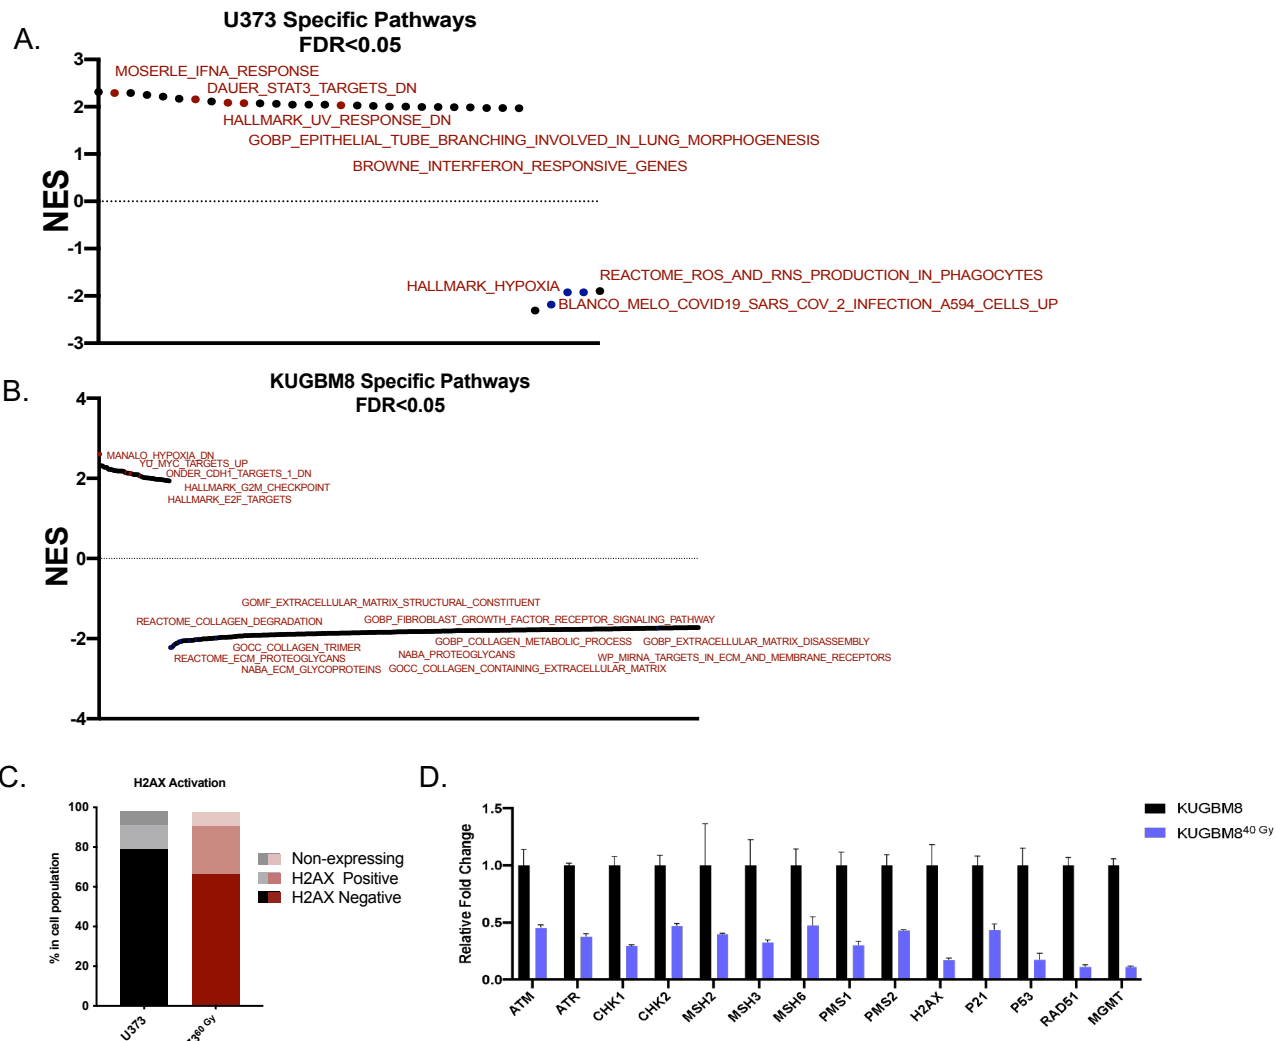

**Supplementary Figure S4. A.** Representation of U373-specific differentially enriched pathways (FDR cut-off <0.05) **B.** Representation of KUGBM8-specific differentially enriched pathways (FDR cut-off <0.05) **C.** Basal H2AX activation levels of U373 and U373<sup>60</sup> Gy cells. **D.** qRT-PCR results showing gene expression levels of different DNA damage response and repair elements in KUGBM8 cells.

| GOBP Regulation of DNA Repair |                |      |          | Reactome DNA DSB Repair |               |      |          | GOBP Regulation of DNA Repair |                |      |          | Reactome DNA DSB Repair |                |      |          |
|-------------------------------|----------------|------|----------|-------------------------|---------------|------|----------|-------------------------------|----------------|------|----------|-------------------------|----------------|------|----------|
| Gene                          | Log2(FC)       | Gene | Log2(FC) | Gene                    | Log2(FC)      | Gene | Log2(FC) | Gene                          | Log2(FC)       | Gene | Log2(FC) | Gene                    | Log2(FC)       | Gene | Log2(FC) |
| PARG                          | 0.10           |      |          | EYA4                    | 0.00 DNA2     |      | 0.11     | UBEQLN4                       | 0.00 RNF169    |      | 0.21     | BABAM1                  | -0.01 PIAS4    |      | 0.27     |
| EYA4                          | 0.00 RAD51     |      | 0.10     | BABAM2                  | -0.01 RFC1    |      | 0.12     | BABAM1                        | -0.01 RPS3     |      | 0.23     | UBE2V2                  | -0.01 MRE11    |      | 0.28     |
| BABAM2                        | -0.01 TWIST1   |      | 0.11     | RAD51C                  | -0.02 NSD2    |      | 0.12     | CCDC117                       | -0.01 PARG     |      | 0.23     | MAPK8                   | -0.02 KDM4A    |      | 0.29     |
| PARG3                         | -0.02 UBR5     |      | 0.11     | RNF168                  | -0.02 UBC     |      | 0.12     | UBE2V2                        | -0.01 SPIRE1   |      | 0.24     | PARP1                   | -0.02 H2BC5    |      | 0.29     |
| RNF168                        | -0.02 NSD2     |      | 0.12     | UIMC1                   | -0.02 H2AX    |      | 0.12     | PARP1                         | -0.02 PARP3    |      | 0.24     | UBB                     | -0.05 RHNO1    |      | 0.29     |
| UIMC1                         | -0.02 H2AX     |      | 0.12     | POL2                    | -0.03 MUS81   |      | 0.13     | ACTR2                         | -0.05 DDX11    |      | 0.25     | POLM                    | -0.05 UBE2N    |      | 0.29     |
| MORF4L1                       | -0.02 UBE2V1   |      | 0.13     | UBE2N                   | -0.04 H2BC9   |      | 0.13     | KDM4D                         | -0.05 OTUB1    |      | 0.26     | POLK                    | -0.07 RAD9A    |      | 0.29     |
| SIRT1                         | -0.03 FMN2     |      | 0.13     | H4C14                   | -0.04 BRIP1   |      | 0.14     | PARP9                         | -0.06 SLF1     |      | 0.26     | BAP1                    | -0.08 KPNA2    |      | 0.32     |
| VPS72                         | -0.03 POT1     |      | 0.13     | UBE2I                   | -0.05 XRCC6   |      | 0.14     | TIGAR                         | -0.07 RNF8     |      | 0.26     | SUMO1                   | -0.09 RAD17    |      | 0.32     |
| PARPBP                        | -0.03 WDR48    |      | 0.14     | NBN                     | -0.06 HA-16   |      | 0.14     | TERF2                         | -0.07 DEK      |      | 0.28     | RAD9B                   | -0.09 H4C4     |      | 0.33     |
| HOGFL2                        | -0.03 OTUB1    |      | 0.14     | H4C8                    | -0.07 FEN1    |      | 0.15     | PNKP                          | -0.12 UBE2N    |      | 0.29     | UBC                     | -0.13 H2BC17   |      | 0.33     |
| UBE2N                         | -0.04 KDM4D    |      | 0.15     | TDP1                    | -0.07 EXO1    |      | 0.17     | RUVBL2                        | -0.13 SPIRE2   |      | 0.30     | UBE2I                   | -0.14 RAD51AP1 |      | 0.33     |
| KDM1A                         | -0.05 TFIP11   |      | 0.16     | SIRT6                   | -0.07 HUS1    |      | 0.17     | POT1                          | -0.13 ERCC8    |      | 0.31     | POLL                    | -0.15 XRCC1    |      | 0.35     |
| MRNIP                         | -0.05 HELB     |      | 0.16     | POLD3                   | -0.08 RPA2    |      | 0.18     | SHLD3                         | -0.14 SETD2    |      | 0.32     | POLD1                   | -0.15 RFC3     |      | 0.37     |
| CDK9                          | -0.05 OGG1     |      | 0.16     | H4C5                    | -0.09 PIAS4   |      | 0.18     | WRNIP1                        | -0.17 RAD51AP1 |      | 0.33     | POLD3                   | -0.16 PALB2    |      | 0.39     |
| SPIRE1                        | -0.06 RPA2     |      | 0.18     | RAD51AP1                | -0.09 NHEJ1   |      | 0.18     | FBH1                          | -0.17 XRCC1    |      | 0.35     | SUMO2                   | -0.19 RMI1     |      | 0.39     |
| ERCC8                         | -0.06 TERF2IP  |      | 0.18     | RNF8                    | -0.10 BAP1    |      | 0.19     | NUDT16L1                      | -0.19 ACTL6A   |      | 0.36     | ERC01                   | -0.20 NSD2     |      | 0.42     |
| WAS                           | -0.07 ARID2    |      | 0.19     | TOP3A                   | -0.12 RAD1    |      | 0.19     | MORF4L1                       | -0.20 OGG1     |      | 0.37     | POLD4                   | -0.22 UBXN1    |      | 0.42     |
| SIRT6                         | -0.07 RNF169   |      | 0.20     | XRCC3                   | -0.15 EME2    |      | 0.19     | SPIDR                         | -0.25 PARPBP   |      | 0.37     | SPIDR                   | -0.24 XRCC6    |      | 0.43     |
| RAD51AP1                      | -0.09 CUL4A    |      | 0.20     | POLD1                   | -0.15 BLM     |      | 0.20     | SIRT6                         | -0.25 SETMAR   |      | 0.39     | SIRT6                   | -0.25 TDP1     |      | 0.44     |
| YEATS4                        | -0.10 ACTR2    |      | 0.21     | UBXN1                   | -0.15 H2BC21  |      | 0.21     | RPA1                          | -0.28 DMAP1    |      | 0.42     | POLD2                   | -0.28 POLD2    |      | 0.44     |
| RNF8                          | -0.10 ERCC6    |      | 0.21     | PARP2                   | -0.16 MAPK8   |      | 0.22     | H4C5                          | -0.28 XRCC5    |      | 0.45     | H2BC9                   | -0.28 RBBP8    |      | 0.45     |
| MORF4L2                       | -0.14 DEK      |      | 0.23     | H2BC5                   | -0.17 POLE    |      | 0.22     | UIMC1                         | -0.30 KMT5B    |      | 0.44     | RAD1                    | -0.29 PPP5C    |      | 0.47     |
| UBQLN4                        | -0.15 CHEK1    |      | 0.23     | ERCC1                   | -0.17 CHEK1   |      | 0.23     | KDM1A                         | -0.30 RBBP8    |      | 0.45     | RFC4                    | -0.29 TIPIN    |      | 0.50     |
| TIGAR                         | -0.15 BRD8     |      | 0.23     | ABRAXAS1                | -0.18 RPA3    |      | 0.23     | MRGBP                         | -0.31 HMGB1    |      | 0.49     | EYA3                    | -0.30 RPS27A   |      | 0.50     |
| RUVBL2                        | -0.16 PPP4R2   |      | 0.23     | POLK                    | -0.19 RFC3    |      | 0.23     | RUVBL1                        | -0.34 RAD51    |      | 0.51     | RAD51B                  | -0.35 RAD51    |      | 0.51     |
| MMS19                         | -0.18 SPIRE2   |      | 0.23     | LIG3                    | -0.19 BAZ1B   |      | 0.23     | TERF2IP                       | -0.35 YEATS4   |      | 0.51     | PPP4R2                  | -0.39 BARD1    |      | 0.57     |
| AXIN2                         | -0.20 FOXM1    |      | 0.24     | UBA52                   | -0.19 PPP4R2  |      | 0.23     | PPP4R2                        | -0.39 TFIP11   |      | 0.52     | H2BC15                  | -0.44 H4C14    |      | 0.59     |
| MAGEF1                        | -0.22 BRCA1    |      | 0.24     | RPS27A                  | -0.20 BRCA1   |      | 0.24     | VPS72                         | -0.40 ACTB     |      | 0.54     | H2BC9                   | -0.46 TOPBP1   |      | 0.60     |
| SHLD3                         | -0.22 SHLD2    |      | 0.25     | RAD9A                   | -0.22 H2BC17  |      | 0.25     | FAM168A                       | -0.41 SHLD2    |      | 0.55     | TOP3A                   | -0.47 POLE2    |      | 0.61     |
| PNKP                          | -0.23 RTEL1    |      | 0.26     | H2BC15                  | -0.24 TDP2    |      | 0.25     | MMS19                         | -0.43 USP1     |      | 0.57     | PPP4C                   | -0.49 WRN      |      | 0.73     |
| HSF1                          | -0.25 POLH     |      | 0.26     | DCLE1C                  | -0.24 RMI1    |      | 0.25     | HSF1                          | -0.45 CUL4A    |      | 0.67     | KDM4B                   | -0.57 FEN1     |      | 0.73     |
| XRCC1                         | -0.26 EPC1     |      | 0.27     | RAD17                   | -0.25 RNF4    |      | 0.26     | HDAC10                        | -0.46 PML      |      | 0.67     | RFC1                    | -0.57 POLE     |      | 0.74     |
| MAD2L2                        | -0.29 POGZ     |      | 0.28     | POLM                    | -0.25 RTEL1   |      | 0.26     | HOGFL2                        | -0.46 CGAS     |      | 0.68     | RAD52                   | -0.59 RIF1     |      | 0.79     |
| ACTL6A                        | -0.30 TRIM28   |      | 0.28     | RPA1                    | -0.25 H2BC4   |      | 0.26     | HELB                          | -0.46 BRD8     |      | 0.69     | EME1                    | -0.59 BAZ1B    |      | 0.80     |
| SPIDR                         | -0.33 EYA3     |      | 0.29     | XRCC1                   | -0.26 POLH    |      | 0.26     | PPP4C                         | -0.49 ARID2    |      | 0.70     | H2BC7                   | -0.60 ABRAXAS1 |      | 0.82     |
| UBE2V2                        | -0.34 SMCHD1   |      | 0.29     | UBB                     | -0.26 SUMO2   |      | 0.27     | CDK9                          | -0.57 DTX3L    |      | 0.71     | XRCC4                   | -0.60 MUSB1    |      | 0.83     |
| ZNF365                        | -0.37 NUDT16L1 |      | 0.31     | KDM4A                   | -0.27 RFC5    |      | 0.28     | RAD52                         | -0.59 AUNIP    |      | 0.72     | PARP2                   | -0.63 HUS1     |      | 0.83     |
| MIR221                        | -0.40 BRCC3    |      | 0.32     | H2BC8                   | -0.27 EYA3    |      | 0.29     | MAD2L2                        | -0.60 RIF1     |      | 0.79     | CCNA1                   | -0.73 ATM      |      | 0.84     |
| SLF1                          | -0.41 RAD52    |      | 0.32     | ABL1                    | -0.29 H2BC11  |      | 0.30     | MORF4L2                       | -0.63 EPC1     |      | 0.80     | CDK2                    | -0.78 PRKDC    |      | 0.84     |
| MRGBP                         | -0.47 FANCB    |      | 0.32     | KDM4B                   | -0.32 BRCA2   |      | 0.31     | TWIST1                        | -0.63 ZCWPW1   |      | 0.83     | RMI2                    | -0.80 EYA4     |      | 0.87     |
| WRNIP1                        | -0.48 DHX9     |      | 0.33     | SPIDR                   | -0.33 BRCC3   |      | 0.32     | ZNF365                        | -0.64 PRKDC    |      | 0.84     | XRCC3                   | -0.81 RAD51D   |      | 0.87     |
| AUNIP                         | -0.50 TP53BP1  |      | 0.36     | UBE2V2                  | -0.34 RAD52   |      | 0.32     | KLHL15                        | -0.76 TRIM28   |      | 0.85     | BABAM2                  | -0.92 CCNA2    |      | 0.87     |
| RMI2                          | -0.50 PPP4R3B  |      | 0.37     | RFC4                    | -0.42 PALB2   |      | 0.33     | SHLD1                         | -0.77 PPP4R3B  |      | 0.87     | RNF168                  | -0.93 PCNA     |      | 0.88     |
| WRAP53                        | -0.50 FAM168A  |      | 0.39     | CHEK2                   | -0.45 LIG4    |      | 0.35     | UBE2V1                        | -0.79 TRIP12   |      | 0.87     | APB1                    | -1.02 DCLRE1C  |      | 0.89     |
| RPS3                          | -0.51 POLQ     |      | 0.40     | EME1                    | -0.46 TP53BP1 |      | 0.36     | KMT5C                         | -0.79 EYA4     |      | 0.87     | CHEK2                   | -1.04 BLM      |      | 0.89     |
| TMEM161A                      | -0.53 ING3     |      | 0.43     | POLL                    | -0.48 SUMO1   |      | 0.37     | RMI2                          | -0.80 PCNA     |      | 0.88     | H2BC10                  | -1.09 CHEK1    |      | 0.90     |
| KMT5C                         | -0.56 SETD2    |      | 0.43     | XRCC4                   | -0.51 CCNA2   |      | 0.40     | POLM                          | -0.88 CHEK1    |      | 0.90     | H2BC21                  | -1.13 POLE4    |      | 0.92     |
| OTUB2                         | -0.64 TRRAP    |      | 0.44     | POLD4                   | -0.58 POLQ    |      | 0.40     | TMEM161A                      | -0.92 TIMELESS |      | 0.99     | EYA1                    | -1.14 ATRIP    |      | 0.95     |
| CEBPB                         | -0.78 EP400    |      | 0.45     | H2BU1                   | -0.63 SMARCA5 |      | 0.40     | RNF168                        | -0.93 RTEL1    |      | 1.00     | LIG3                    | -1.20 HERC2    |      | 0.97     |
| KLHL15                        | -0.79 ACTB     |      | 0.48     | APBB1                   | -0.82 TIPIN   |      | 0.40     | CEBPB                         | -1.02 FOXM1    |      | 1.00     | H2BC8                   | -1.49 TP53     |      | 0.97     |
| PRKCG                         | -1.24 PML      |      | 0.51     | H2BC7                   | -1.36 ATM     |      | 0.41     | MAGEF1                        | -1.13 BRCA1    |      | 1.02     | H2BC13                  | -1.55 EME2     |      | 0.99     |
| MEAF6                         | 0.00 HDAC10    |      | 0.53     | ERCC4                   | 0.00 GEN1     |      | 0.42     | AXIN2                         | -1.13 TRRAP    |      | 1.03     | UBA52                   | 0.01 TIMELESS  |      | 0.99     |
| PRKDC                         | 0.01 EGFR      |      | 0.55     | MRE11                   | 0.00 WRN      |      | 0.44     | EYA1                          | -1.14 SLF2     |      | 1.11     | ERCC4                   | 0.01 RTEL1     |      | 1.00     |
| CYREN                         | 0.01 SLF2      |      | 0.55     | PRKDC                   | 0.01 RAD50    |      | 0.46     | NPAS2                         | -1.74 FMN2     |      | 1.12     | SMARCA5                 | 0.04 BRCA1     |      | 1.02     |
| KMT5B                         | 0.01 DTX3L     |      | 0.57     | RAD51D                  | 0.01 HERC2    |      | 0.48     | MGMT                          | -1.78 BRCC3    |      | 1.13     | ABL1                    | 0.06 BRIP1     |      | 1.07     |
| PPP4C                         | 0.01 PARP9     |      | 0.59     | PPP4C                   | 0.01 CLSPN    |      | 0.55     | OTUB2                         | -1.84 EP400    |      | 1.17     | POLQ                    | 0.08 CLSPN     |      | 1.09     |
| DDX11                         | 0.01 SETMAR    |      | 0.65     | POLE2                   | 0.01 H4C9     |      | 0.59     | WAS                           | -2.01 SMCHD1   |      | 1.22     | RFC2                    | 0.10 HA-16     |      | 1.11     |
| FBH1                          | 0.02 NPAS2     |      | 0.66     | CDK2                    | 0.03 XRCC5    |      | 0.60     | PRKCG                         | -3.15 TEX15    |      | 1.23     | TP53BP1                 | 0.11 ATR       |      | 1.12     |
| USP1                          | 0.03 PCNA      |      | 0.74     | XRCC2                   | 0.04 H2BC6    |      | 0.64     | FGF10                         | -5.59 SIRT1    |      | 1.24     | SLX4                    | 0.12 PAXIP1    |      | 1.13     |
| MBT01                         | 0.03 ZCWPW1    |      | 0.75     | RFC2                    | 0.04 ATR      |      | 0.66     | WRAP53                        | 0.02 ING3      |      | 1.31     | POLH                    | 0.12 BRCC3     |      | 1.13     |
| TIMELESS                      | 0.04 TEX15     |      | 0.76     | TIMELESS                | 0.04 PCNA     |      | 0.74     | MBT01                         | 0.05 FUS       |      | 1.37     | RPA2                    | 0.13 NBN       |      | 1.22     |
| PARP1                         | 0.04 RIF1      |      | 0.78     | PARP1                   | 0.04 BARD1    |      | 0.76     | RECQL5                        | 0.05 ERCC8     |      | 1.40     | RPA3                    | 0.14 DNA2      |      | 1.33     |
| RECQL5                        | 0.05 TRIP12    |      | 0.85     | BABAM1                  | 0.05 RIF1     |      | 0.78     | UBR5                          | 0.06 H2AX      |      | 1.41     | RAD51C                  | 0.14 BRCA2     |      | 1.37     |
| BABAM1                        | 0.05 FUS       |      | 0.88     | KAT5                    | 0.06 H2BC10   |      | 0.81     | POLQ                          | 0.08 KAT5      |      | 1.41     | RFC5                    | 0.15 H2AX      |      | 1.41     |
| RUVBL1                        | 0.06 EPC2      |      | 0.89     | MDC 1.00                | 0.07 H2BC12   |      | 1.01     | SIRT7                         | 0.09 CYREN     |      | 1.53     | LIG4                    | 0.17 KAT5      |      | 1.41     |
| KAT5                          | 0.06 HMGA2     |      | 1.08     | POL3                    | 0.07 H4C3     |      | 1.07     | TP53BP1                       | 0.11 USP51     |      | 1.76     | H4C3                    | 0.18 RAD50     |      | 1.43     |
| TERF2                         | 0.08 EYA2      |      | 1.24     | TP53                    | 0.07 SLX1B    |      | 1.18     | POLH                          | 0.12 FIGLN1    |      | 1.78     | TDP2                    | 0.20 H4C9      |      | 1.48     |
| SIRT7                         | 0.08 EYA1      |      | 1.37     | ATRIP                   | 0.08 EYA2     |      | 1.24     | RPA2                          | 0.13 EPC2      |      | 1.82     | POLE3                   | 0.20 XRCC2     |      | 1.57     |
| CCDC117                       | 0.08 RADX      |      | 2.59     | PAXIP1                  | 0.08 EYA1     |      | 1.37     | MEAF6                         | 0.14 DHX9      |      | 1.83     | EXO1                    | 0.22 H2BC11    |      | 1.82     |
| HMGB1                         | 0.09 MGMT      |      | 5.26     | PPSPC                   | 0.08 H2BC13   |      | 1.37     | KAT7                          | 0.14 EGFR      |      | 1.85     | RNF4                    | 0.23 H2BC12    |      | 2.02     |
| DMAP1                         | 0.09           |      |          | RHNO1                   | 0.09 RAD9B    |      | 1.49     | MRNIP                         | 0.16 MIR221    |      | 2.69     | MDC 1.00                | 0.26 NHEJ1     |      | 2.03     |
| RBBP8                         | 0.09           |      |          | RBBP8                   | 0.09 CCNA1    |      | 1.77     | WDR48                         | 0.18 HMGA2     |      | 3.04     | RNF8                    | 0.26 GEN1      |      | 2.27     |
| KAT7                          | 0.09           |      |          | SLX4                    | 0.10 H4C4     |      | 3.18     | FANCB                         | 0.20 RADX      |      | 6.67     |                         | H4C8           |      | 2.34     |
| FIGLN1                        | 0.10           |      |          | RAD51                   | 0.10          |      |          |                               |                |      |          |                         | H2BC4          |      | 3.01     |
|                               |                |      |          | POLE4                   | 0.11          |      |          |                               |                |      |          |                         |                |      |          |

**Supplementary Table S1. A-B.** DEG scores list of GOBP Regulation of DNA Repair **(A)** and Reactome DNA DSB Repair **(B)** gene sets for U373 cells. **C-D.** DEG Scores list of GOBP Regulation of DNA Repair **(C)** and Reactome DNA DSB Repair **(D)** gene sets for KUGBM8 cells.

| Gene  | Sequence of Forward Primer (5'-3') | Sequence of Reverse Primer (5'-3') |
|-------|------------------------------------|------------------------------------|
| GAPDH | AGCCACATCGCTCAGACAC                | GCCCAATACGACCAAATCC                |
| ATM   | CATCGCATGTGATTAAAGCA               | TTCTGATAGGAATCAGGGC                |
| ATR   | CAATTGTGGAGGAGATTTCC               | CTTCTGAGAACTCTTGATCTG              |
| CHK1  | CGGTATAATAATCGTGAGCG               | TTCCAAGGGTTGAGGTATGT               |
| CHK2  | CTCGGGAGTCGGATGTTGAG               | GAGTTTGGCATCGTGCTGGT               |
| MSH2  | TTGATGGCCAGAGACAGGTT               | CCATGTCTCCAGCAGTCTCT               |
| MSH3  | CCATCATGGCTCAGATTGGC               | ATCATGAGTGCTCGTCCCTC               |
| MSH6  | ACTTCAGCAGGGACGTAACA               | ACTTCAGCAGGGACGTAACA               |
| PMS1  | ATGAGTGGAGCAGGGGAAAT               | CACTTGCTGACATGGGTTTCT              |
| PMS2  | ACTTCCGTGGATTCTGAGGG               | GTGTTTGGGGTTGCGAGATT               |
| MLH1  | CTACTTCCAGCAACCCCAAGA              | AGAACCTCATGTCCCTGCTC               |
| H2AX  | ACTCAACTGGGCAATCCAAG               | GGGTTAGCTGCAGAATTCCA               |
| p21   | GGCAGACCAGCATGACAGATTT             | AAGATGTAGAGCGGGCCTTTGA             |
| TP53  | GGTGACACGCTTCCCTGGATT              | AGGGGGACAGAACGTTGTTTTAG            |
| RAD51 | TGCGGACCGAGTAATGGCA                | TCCTTCTTTGGCGCATAGGCA              |
| VEGFA | TGTGAATGCAGACCAAAGAAAGA            | ACCAACGTACACGCTCCAG                |
| MGMT  | GGATTGCCTCTCATTGCTCC               | CCCGTTTTCCAGCAAGAGTC               |

**Supplementary Table S2.** List of primers and sequences used in qRT-PCR

| Antibody            | Brand/Catalog Number  |
|---------------------|-----------------------|
| Phospho-ATR Ser428  | Cell Signaling/5161   |
| ATR Total           | Cell Signaling/2790   |
| Phospho-ATM Ser1981 | Cell Signaling/13050  |
| ATM total           | Cell Signalling/11G12 |
| Phospho-CHK1 Ser345 | Cell Signalling/133D3 |
| CHK1                | Cell Signalling/23605 |
| Phospho-CHK2 Ser19  | Cell Signalling/2666  |
| CHK2                | Cell Signalling/2662S |
| $\gamma$ H2AX       | EMD Millipore/05-636  |
| RAD51               | Abcam/ab213           |
| MSH2                | Abcam/ab52266         |
| MSH6                | Abcam/ab92471         |
| PMS1                | Abcam/ab129020        |
| PMS2                | Abcam/ab110638        |
| MLH1                | Abcam/ab92312         |
| MSH3                | Abcam/ab111107        |
| $\alpha$ -tubulin   | Abcam/ab15246         |
| GAPDH               | Abcam/ab9485          |

**Supplementary Table S3.** List of primary antibodies used in Western Blot

| Antibody                                         | Brand/ Catalog Number |
|--------------------------------------------------|-----------------------|
| Anti-vinculin                                    | Abcam/ab73412         |
| Rhodamin-phalloidin                              | Thermo R415           |
| Mounting medium with DAPI                        | Abcam/ab104139        |
| Phosphor-Histone H2A.X<br>(Ser139)               | Millipore/05-636      |
| 53BP1                                            | Novus/NB100-304       |
| Alexa Fluor® 488 Anti- IgG<br>Secondary Antibody | Invitrogen            |
| Alexa Fluor® 594 Anti- IgG<br>Secondary Antibody | Invitrogen            |

**Supplementary Table S4.** List of primary and secondary antibodies used in immunofluorescence staining
